# Supplementary material for: Short-term Western-style diet negatively impacts reproductive outcomes in primates
Source: JCI journal article supplement (doi:10.1172/jci.insight.138312), 2021-02-22
Supplement: sd1 [file 1]

**Supplementary Figure 1. Quality control assessment of the RNA-seq data from blastocysts.**

**(a)** Bar graph showing the total gene counts per sample after alignment. Note that two samples, one from each COS, exhibited a reduced number of total genes highlighted in pink. **(b)** A Euclidean distance clustering map demonstrated that these two outliers clustered together away from the other samples and were likely contaminated with DNA.

**Supplementary Table 1. Assay metrics for the cytokine analysis.** The concentration of 29 cytokines was analyzed in the follicular fluid samples of the female rhesus macaques post-SCD and post-WSD with an automated multiplex ELISA system (Luminex 29-plex). Intra-assay coefficient of variation (CV) has been provided for each cytokine analyzed in the table below.

| Target Cytokine | Intra-Assay CV (%) |
|-----------------|--------------------|
| FGF Basic       | 2.64               |
| IL1B            | 3.13               |
| G-CSF           | 3.57               |
| IL10            | 3.86               |
| IL6             | 3.00               |
| IL12            | 4.62               |
| RANTES          | 11.27              |
| Eotaxin         | 14.23              |
| IL17            | 8.86               |
| MIP1A           | 2.79               |
| GMCSF           | 5.72               |
| MIP1B           | 3.98               |
| MCP1            | 4.86               |
| IL15            | 10.05              |
| EGF             | 3.81               |
| IL5             | 9.48               |
| HGF             | 3.59               |
| VEGF            | 11.06              |
| IFNG            | 2.88               |
| MDC             | 4.63               |
| ITAC            | 10.21              |
| MIF             | 0.93               |
| IL1RA           | 4.78               |
| TNFA            | 7.22               |
| IL2             | 8.23               |
| IP10            | 4.59               |
| MIG             | 0.00               |
| IL4             | 4.44               |
| IL8             | 2.94               |

**Supplementary Table 2. Assay metrics for the steroid analysis (LC/MS).** The concentration of seven steroids were assessed in the follicular fluid samples of the female rhesus macaques post-SCD and post-WSD by LC/MS. Intra-assay co-efficient of variation (CV) and accuracy of the assay has been provided for each steroid analyzed in the table below.

| <b>Steroid Hormone</b> | <b>Accuracy (%)</b> | <b>Intra-assay CV (%)</b> |
|------------------------|---------------------|---------------------------|
| Cortisol               | 93.9                | 1.5                       |
| Cortisone              | 94.0                | 2.1                       |
| Testosterone           | 94.4                | 4.0                       |
| Estradiol              | 101.1               | 2.8                       |
| Estrone                | 99.2                | 2.4                       |
| Progesterone           | 87.9                | 1.8                       |
| Androstenedione        | 103.0               | 3.5                       |

**Supplementary Table 3. Distribution of blastocyst samples for RNA-seq from COS #1 and COS #2.** RNA-Seq analysis was performed on 15 samples from COS #1 and 18 samples from COS #2. These samples were grouped based on occurrence of fragmentation and multipolar divisions during preimplantation development. The table also indicates the females to which the blastocysts can be attributed.

| <b>Sample Name</b> | <b>Embryo Information</b>      | <b>Female Number</b> |
|--------------------|--------------------------------|----------------------|
| COS_1_1            | Fragmented, non-multipolar     | 1                    |
| COS_1_2            | Fragmented, non-multipolar     | 2                    |
| COS_1_3            | Fragmented, non-multipolar     | 2                    |
| COS_1_4            | Fragmented, non-multipolar     | 3                    |
| COS_1_5            | Fragmented, non-multipolar     | 4                    |
| COS_1_6            | Fragmented, non-multipolar     | 4                    |
| COS_1_7            | Fragmented, non-multipolar     | 5                    |
| COS_1_8            | Non-fragmented, non-multipolar | 1                    |
| COS_1_9            | Non-fragmented, non-multipolar | 1                    |
| COS_1_10           | Non-fragmented, non-multipolar | 2                    |
| COS_1_11           | Non-fragmented, non-multipolar | 2                    |
| COS_1_12           | Non-fragmented, non-multipolar | 3                    |
| COS_1_13           | Non-fragmented, non-multipolar | 5                    |
| COS_1_14           | Non-fragmented, non-multipolar | 5                    |
| COS_1_15           | Non-fragmented, non-multipolar | 5                    |
| COS_2_1            | Fragmented, non-multipolar     | 1                    |
| COS_2_2            | Fragmented, non-multipolar     | 2                    |
| COS_2_3            | Fragmented, non-multipolar     | 2                    |
| COS_2_4            | Fragmented, non-multipolar     | 3                    |
| COS_2_5            | Fragmented, non-multipolar     | 3                    |
| COS_2_6            | Fragmented, non-multipolar     | 4                    |
| COS_2_7            | Fragmented, non-multipolar     | 4                    |
| COS_2_18           | Fragmented, non-multipolar     | 7                    |
| COS_2_8            | Fragmented, non-multipolar     | 6                    |
| COS_2_9            | Non-fragmented, non-multipolar | 1                    |
| COS_2_10           | Non-fragmented, non-multipolar | 1                    |
| COS_2_11           | Non-fragmented, non-multipolar | 2                    |
| COS_2_12           | Non-fragmented, non-multipolar | 2                    |
| COS_2_13           | Non-fragmented, non-multipolar | 3                    |
| COS_2_14           | Non-fragmented, non-multipolar | 5                    |
| COS_2_15           | Non-fragmented, non-multipolar | 5                    |
| COS_2_16           | Non-fragmented, non-multipolar | 5                    |
| COS_2_17           | Non-fragmented, non-multipolar | 5                    |
